# Supplementary material
Source: Springer Nature journal article supplement (https://www.springermedizin.de/resource/supplementary/13054_2004_3018_MOESM1_ESM.pdf/9719544)
Supplement: MOESM1 [file 9719544]

Additional file 1

**The JMIP (Jornadas de Medicina Intensiva da Primavera) Study Group.**

Participants:

Ana Isabel Paixão (Centro Hospitalar de Gaia - V.N.Gaia); António Carneiro (Hospital Geral de Santo António - Porto); Cristina Granja (Hospital Pedro Hispano - Matosinhos); Eduardo Silva (Hospital do Desterro - Lisboa); Helena Estrada (Hospital Santo António dos Capuchos - Lisboa); José Vaz (Hospital José Joaquim Fernandes - Beja); Lurdes Gonçalves (Hospital de Vila Real - Vila Real); Paula Coutinho (Centro Hospitalar de Coimbra - Coimbra); Paulo Martins (Hospital Universitário de Coimbra - Coimbra); Piedade Amaro (Hospital de S. Sebastião - Sta. Maria da Feira); Cláudia Dias e Altamiro Costa Pereira (Serviço Biostatística e Informática Médica da Faculdade de Medicina da Universidade do Porto - Porto).
